# Supplementary material
Source: PubMed Central journal article supplement (PMC5600190)
Supplement: NIHMS752795-supplement.pdf [file NIHMS752795-supplement.pdf]

## Supplemental Material for “Atypical Protein Kinase C Dependent Polarized Cell Division is Required for Myocardial Trabeculation”

Authors: Derek Passer<sup>1,2,3</sup>, Annebel van de Vrugt<sup>1,2</sup>, Ayhan Atmanli<sup>1,2</sup>, and Ibrahim Domian<sup>1,2,4,\*</sup>

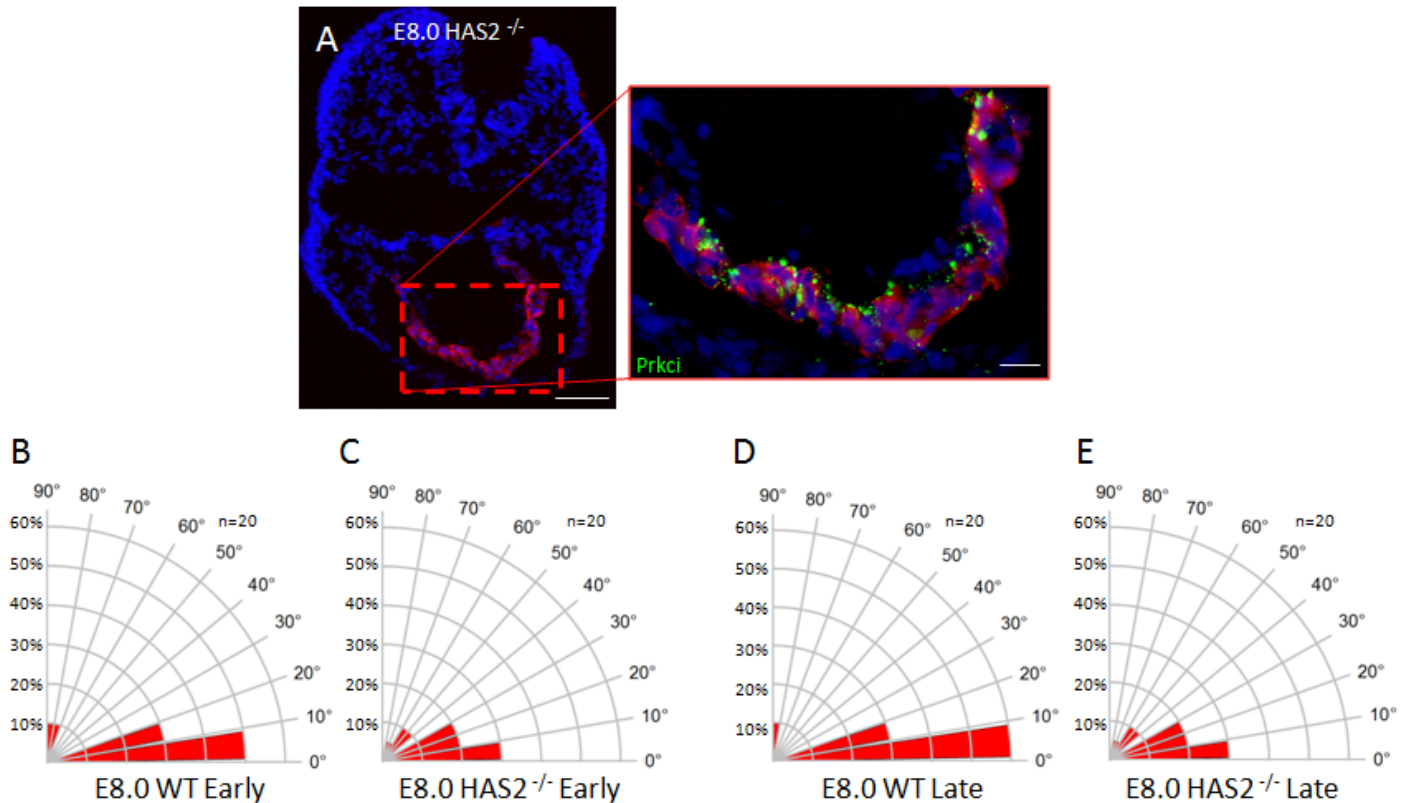

**Figure S1 (related to figure 3): HA in the cardiac jelly is required for polarized cell division in E8.0 mouse hearts.** **A.** E8.0 HAS2<sup>-/-</sup> embryo co-stained for TnT (purple), Prkci (green), and DAPI (blue). **B-C.** Radial histogram depicting the orientation of cardiomyocyte divisions in early-stage mitotic cells from E8.0 HAS2<sup>-/-</sup> hearts. **D-E.** Radial histogram depicting the orientation of cardiomyocyte divisions in late-stage mitotic cells from E8.0 HAS2<sup>-/-</sup> hearts. Scale bars: 100 $\mu$ m zoom out, 10 $\mu$ m zoom in. P values ( $P \leq 0.001$  for early and late mitosis) determined by a chi-square test in B&C and D&E for determining significance of the difference between HAS2 null and wildtype cells. Chi-square P values related to B&C and D&E are in Table S1. n values in B&C and D&E represent the number of cells analysed from 3 to 5 independent animals.

| Genotype                                               | Observed<br>(Expected)<br>n=47 |
|--------------------------------------------------------|--------------------------------|
| <b>Nkx 2.5 <sup>+/-cre</sup> Prkci<sup>fl/fl</sup></b> | <b>0 (12)</b>                  |
| Nkx 2.5 <sup>+/+</sup> Prkci <sup>fl/fl</sup>          | 15 (12)                        |
| Nkx 2.5 <sup>+/-cre</sup> Prkci <sup>+/fl</sup>        | 21 (12)                        |
| Nkx 2.5 <sup>+/+</sup> Prkci <sup>+/fl</sup>           | 11 (12)                        |

Figure S2 (related to figure 4): Genotypes of pups born from an Nkx 2.5<sup>+/-cre</sup>/Prkci<sup>+/fl</sup> male crossed with a Prkci<sup>fl/fl</sup> female. Graph showing observed and expected genotypes of pups born from an Nkx 2.5<sup>+/-cre</sup>/Prkci<sup>+/fl</sup> male crossed with a Prkci<sup>fl/fl</sup> female.

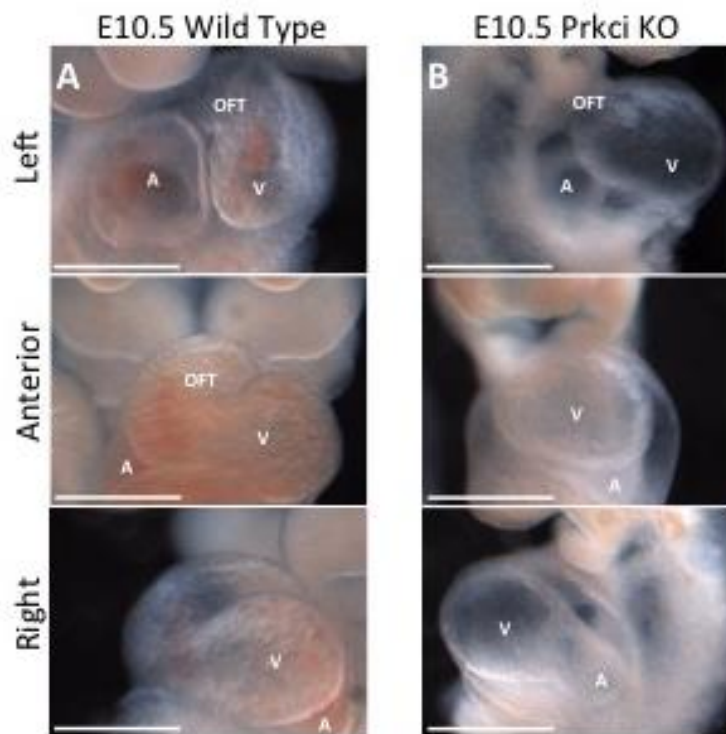

Online Figure S3 (related to figure 4): Gross morphological analysis of an E10.5 Prkci cardiac null mouse heart. External structures of the heart from an E10.5 wild-type (A) and an E10.5 Prkci cardiac null embryo (B). Scale bars: 1mm.

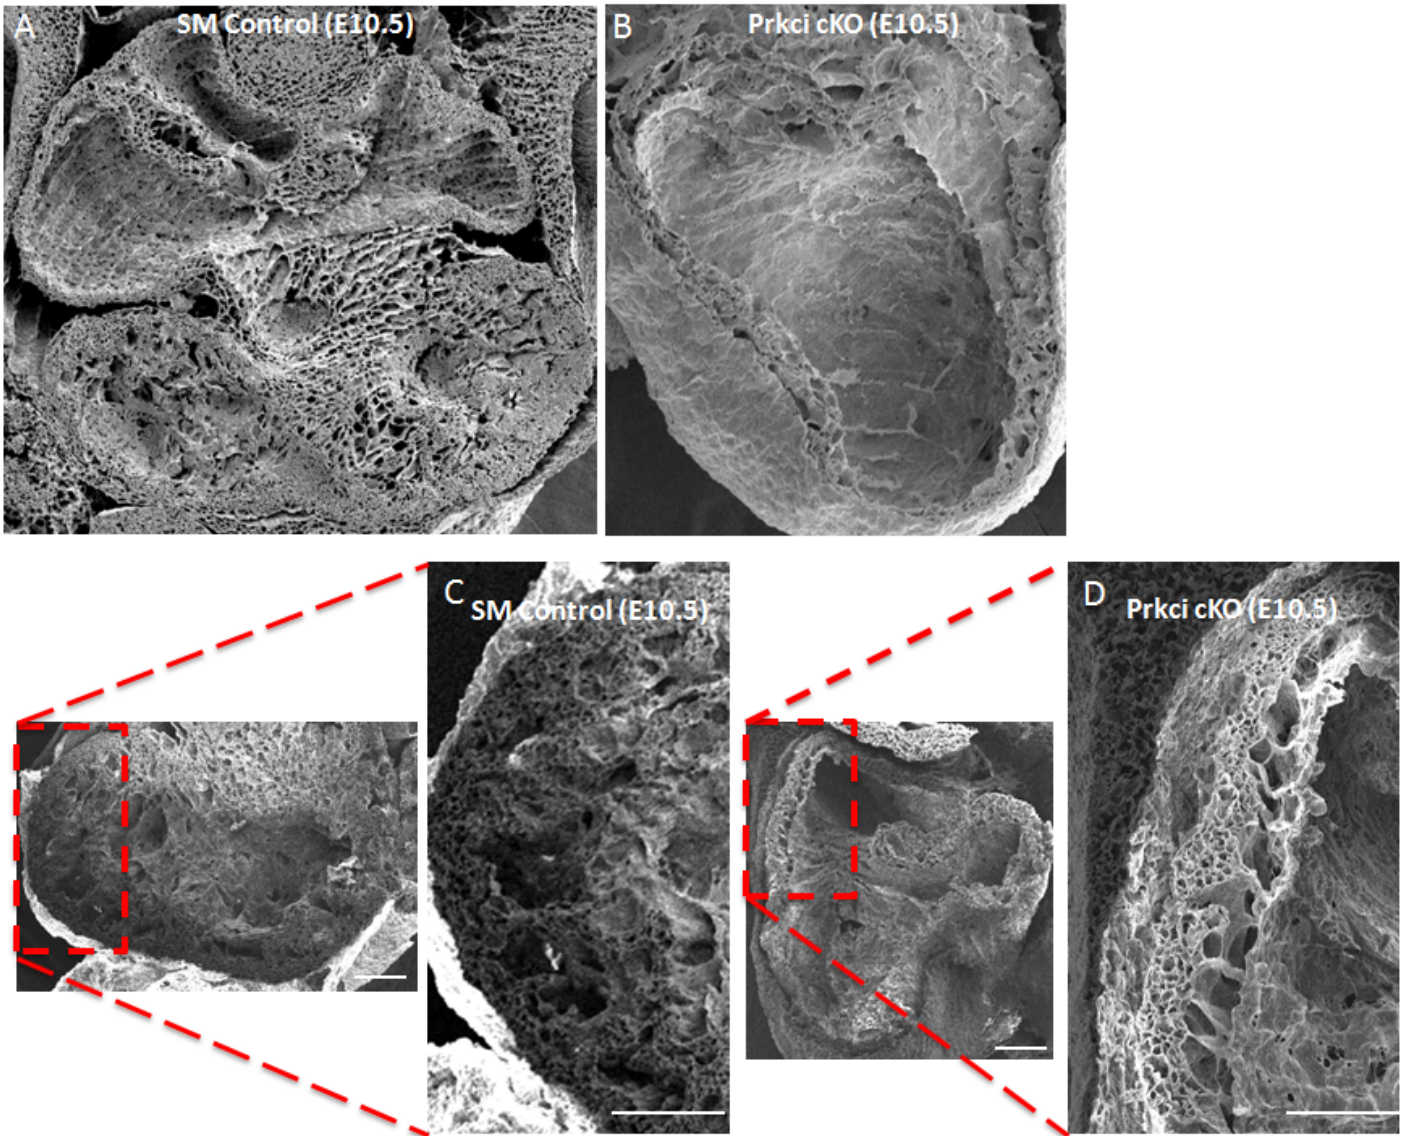

**Figure S4 (related to figure 4): Scanning EM of an E10.5 Prkci cardiac null mouse heart.** Scanning EM images of a cryosectioned E10.5 littermate heart (A) or E10.5 Prkci cardiac null heart (B). C-D. Zoomed out and zoomed in scanning EM images of a cryosectioned E10.5 littermate heart (C) or E10.5 Prkci cardiac null heart (D) showing the lack of trabeculations in the mutant heart. Scale bars: 100 $\mu$ m zoom out and 10 $\mu$ m zoom in.

| Genotype                                             | Observed<br>(Expected)<br>n=40 |
|------------------------------------------------------|--------------------------------|
| <b>Nkx 2.5<sup>+/-cre</sup> NuMA<sup>fl/fl</sup></b> | <b>0 (10)</b>                  |
| Nkx 2.5 <sup>+/-</sup> NuMA <sup>fl/fl</sup>         | 11 (10)                        |
| Nkx 2.5 <sup>+/-cre</sup> NuMA <sup>+/-fl</sup>      | 18 (10)                        |
| Nkx 2.5 <sup>+/-</sup> NuMA <sup>+/-fl</sup>         | 11 (10)                        |

**Figure S5 (related to figure 6): Genotypes of pups born from an Nkx 2.5<sup>+/-cre</sup>/NuMA<sup>+/-fl</sup> male crossed with a NuMA<sup>fl/fl</sup> female.** Graph showing observed and expected genotypes of pups born from an Nkx 2.5<sup>+/-cre</sup>/NuMA<sup>+/-fl</sup> male crossed with a NuMA<sup>fl/fl</sup> female.

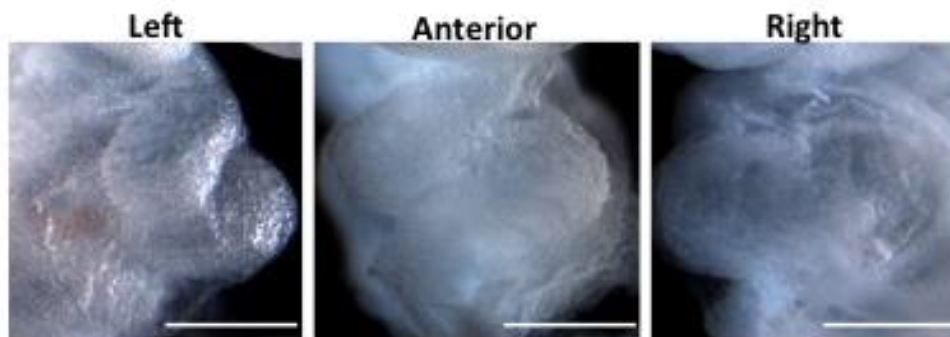

**Figure S6 (related to figure 6): Gross morphological analysis of an E10.5 NuMA cardiac null mouse heart.** External structures of the heart from an E10.5 NuMA cardiac null embryo. Scale bars: 1mm.

| Condition 1            | Condition 2            | Figures   | Chi <sup>2</sup> p value | Significance |
|------------------------|------------------------|-----------|--------------------------|--------------|
| E8.5 WT (Early)        | E8.5 HAS2 null (Early) | 2B & 3G   | <0.001                   | ***          |
| E8.5 WT (Late)         | E8.5 HAS2 null (Late)  | 2D & 3H   | <0.001                   | ***          |
| E8.0 WT (Early)        | E8.0 HAS2 null (Early) | S1B & S1C | <0.001                   | ***          |
| E8.0 WT (Late)         | E8.0 HAS2 null (Late)  | S1D & S1E | <0.001                   | ***          |
| E8.5 WT (Early)        | E8.5 CD44 null (Early) | 2B & 3O   | 0.1                      | NS           |
| E8.5 WT (Late)         | E8.5 CD44 null (Late)  | 2D & 3P   | 0.1                      | NS           |
| E8.5 WT (Early)        | E8.5 Prkci cKO (Early) | 2B & 5B   | <0.001                   | ***          |
| E8.5 WT (Late)         | E8.5 Prkci cKO (Late)  | 2D & 5D   | 0.002                    | ***          |
| E8.5 WT (Early)        | E8.5 NuMA cKO (Early)  | 2B & 7B   | <0.001                   | ***          |
| E8.5 WT (Late)         | E8.5 NuMA cKO (Late)   | 2D & 7D   | 0.01                     | **           |
| E8.5 WT (Early)        | E8.5 WT (Late)         | 2B & 2D   | 0.5                      | NS           |
| E8.5 HAS2 null (early) | E8.5 HAS2 null (Late)  | 3G & 3H   | .1                       | NS           |
| E8.0 HAS2 null (early) | E8.0 HAS2 null (Late)  | S1C & S1E | .1                       | NS           |
| E8.5 CD44 null (Early) | E8.5 CD44 null (Late)  | 3O & 3P   | .1                       | NS           |
| E8.5 Prkci cKO (Early) | E8.5 Prkci cKO (Late)  | 5B & 5D   | 0.2                      | NS           |
| E8.5 NuMA cKO (Early)  | E8.5 NuMA cKO (Late)   | 7B & 7D   | 0.1                      | NS           |

**Table S1: Chi-square test values for spindle orientation and cell division plane.** Cells were categorized as perpendicular (70-90°), planar (0-20°), or oblique (20°-70°). No statistical differences were ever found between age-matched littermates.
